# Announcement

---

## Heinrich Warner Stiftung

---

### Submission of the Heinrich-Warner-Price 1988/89

1. The Heinrich-Warner-Price will be granted every two years. The endowment of the submission for 1988/89 will be  
DM 40,000.-.  
The price is for outstanding scientific clinical or experimental research in the field of urologic oncology which is not yet published.
2. The winner of the Heinrich-Warner-Price will be invited to present his work at the Symposium of the Heinrich-Warner-Stiftung held every two years in Hamburg (FRG). This will be published together with the other presentations of the Symposium.
3. Applications should be sent in German or English language. The board of the foundation has no objection that the work will be published after it was sent in to the Heinrich-Warner-Stiftung even if it would be published before the price has been granted. Several authors can participate.
4. The paper has to be forwarded until 31. Dezember 1988 to  
Mr. Ernst Jürgen Mellin  
Magdalenenstrasse 7  
D-2000 Hamburg 13 (FRG)  
with name of the author/authors, his address and his profession.
